# Supplementary material for: ANGPTL2 binds MAG to efficiently enhance oligodendrocyte differentiation
Source: PubMed Central journal article supplement (PMC9976406; doi:10.1186/s13578-023-00970-3), 2023-02-28

# Full unedited gel for Figure 1C

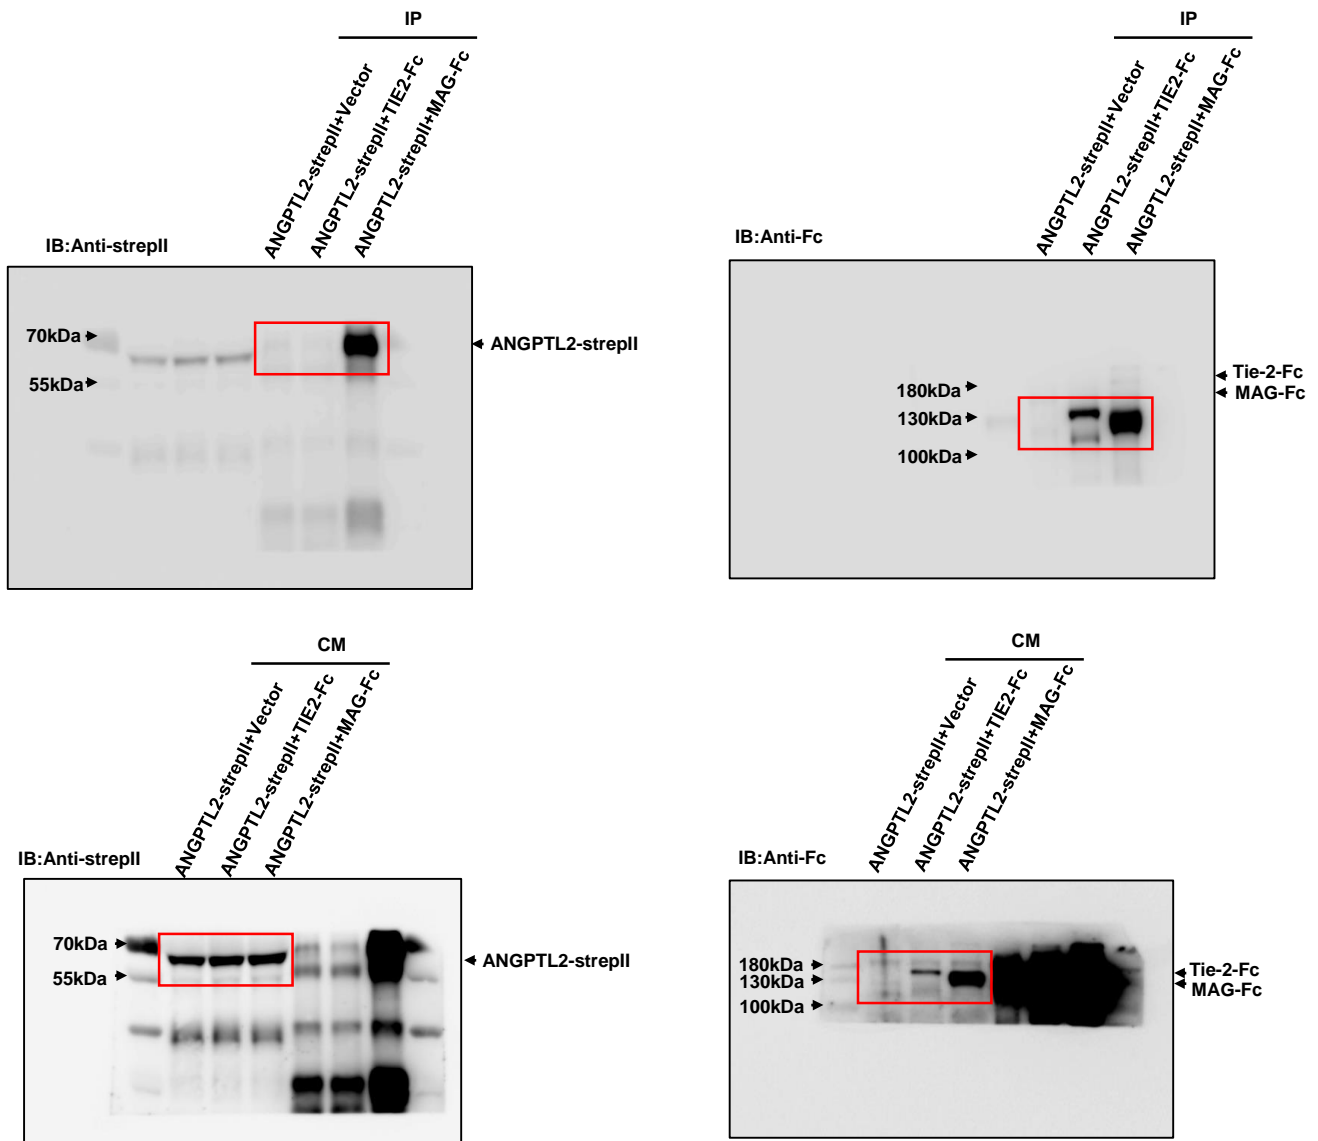

# Full unedited gel for Figure S1B

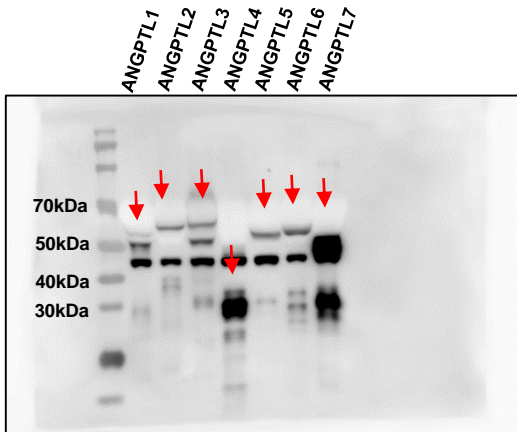

# Full unedited gel for Figure 2C

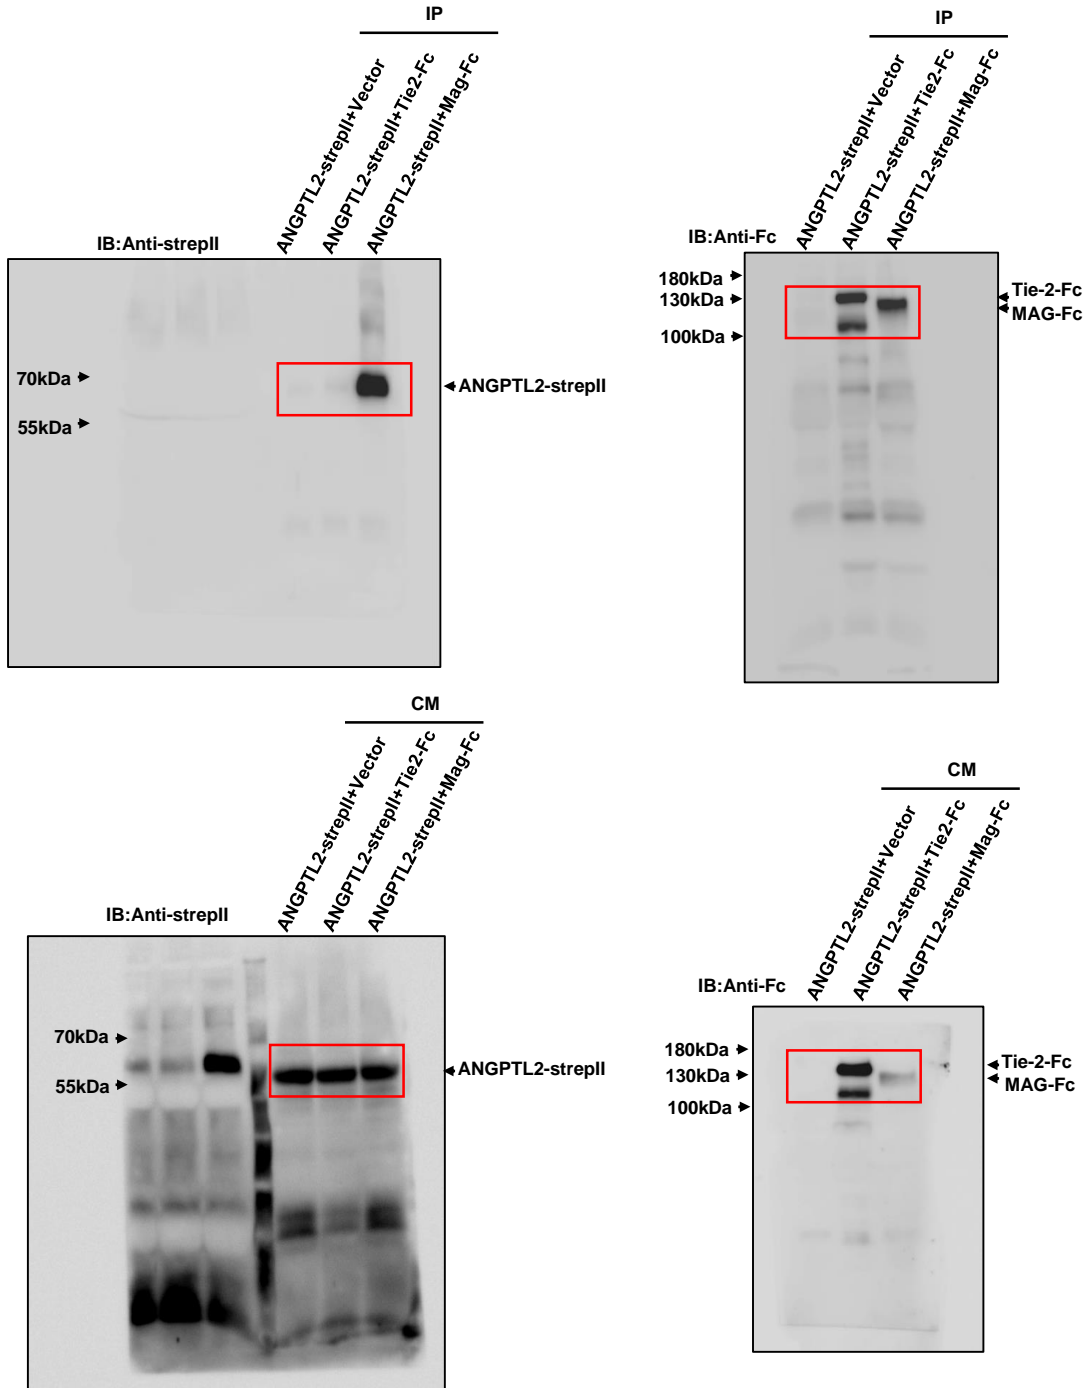

## Full unedited gel for Figure S3C

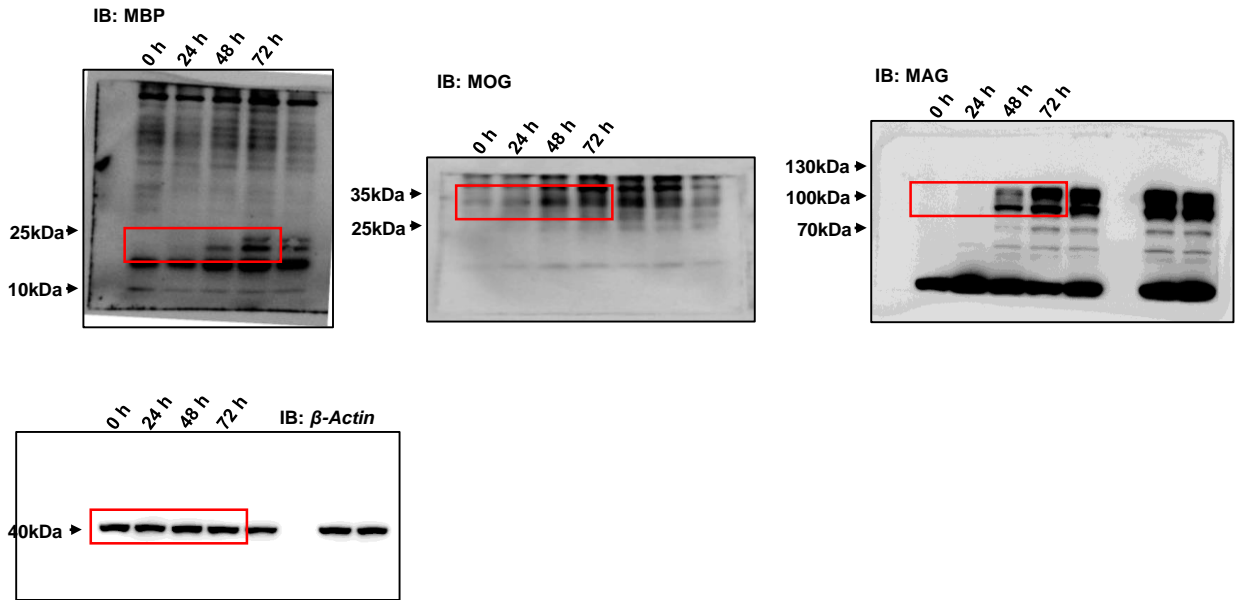

## Full unedited gel for Figure S3D

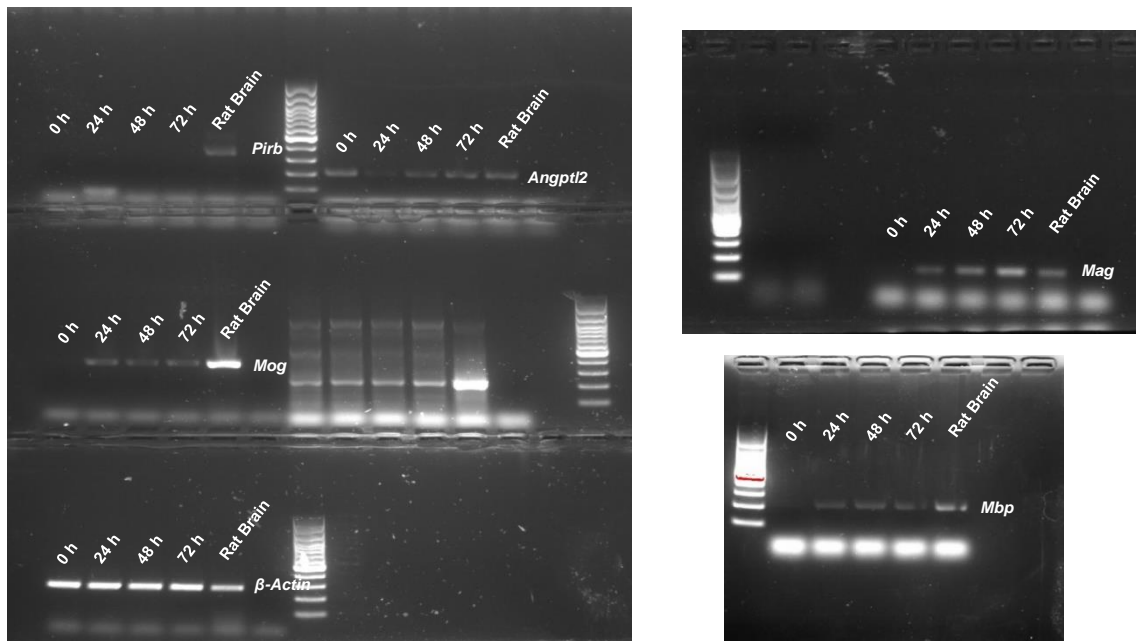

## Full unedited gel for Figure S3E

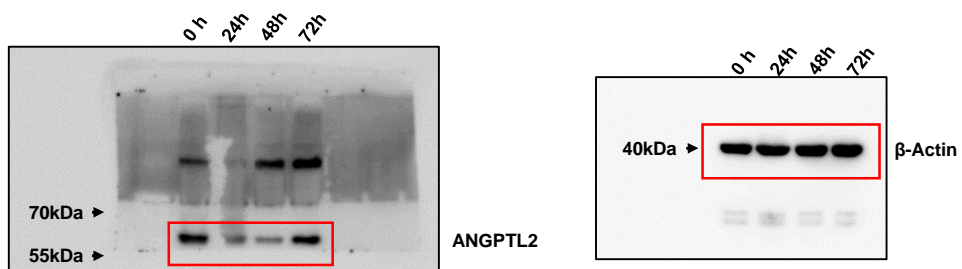

# Full unedited gel for Figure S3J

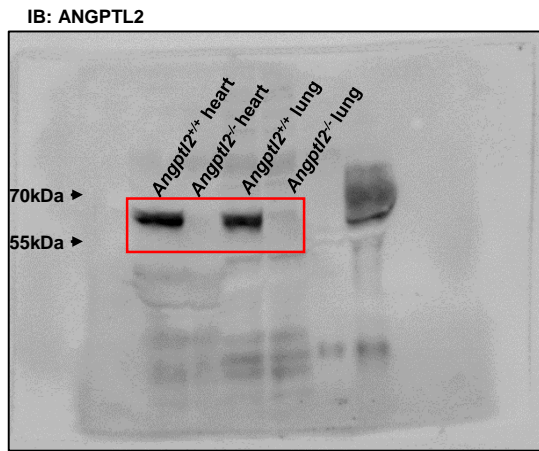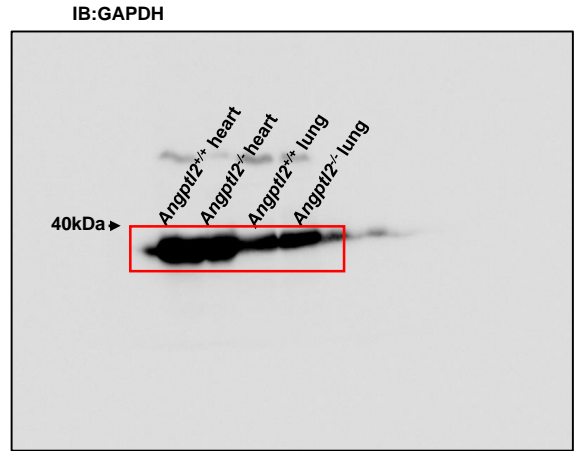

IB: ANGPTL2

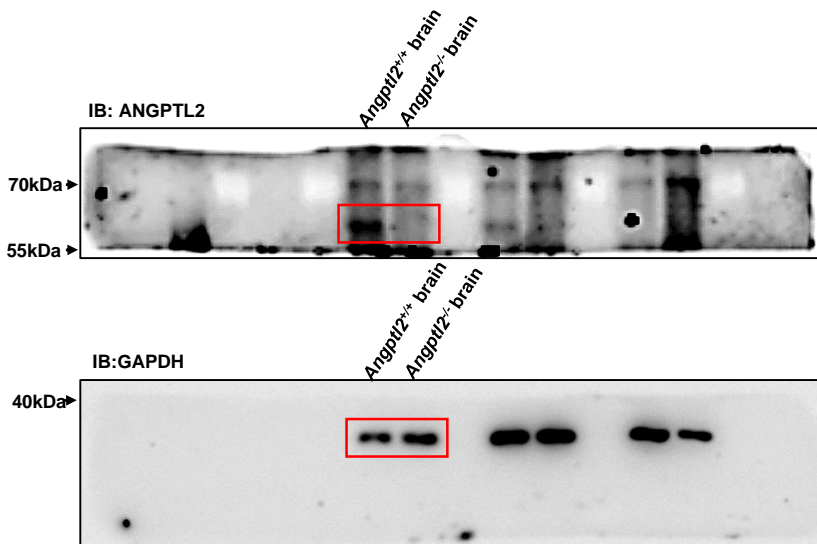

## Full unedited gel for Figure 6D

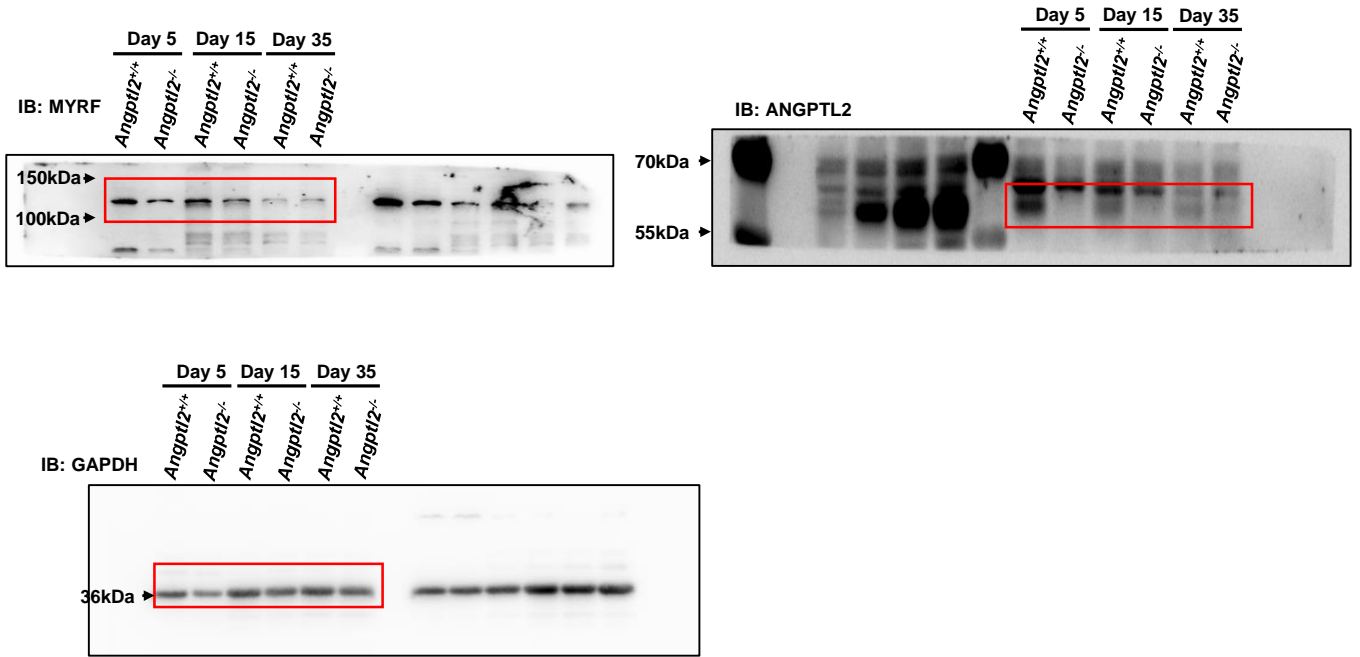

## Full unedited gel for Figure 6E

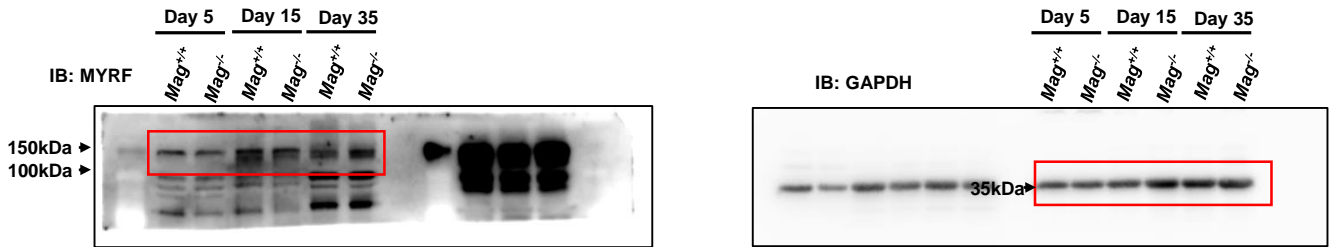

## Full unedited gel for Figure 6F

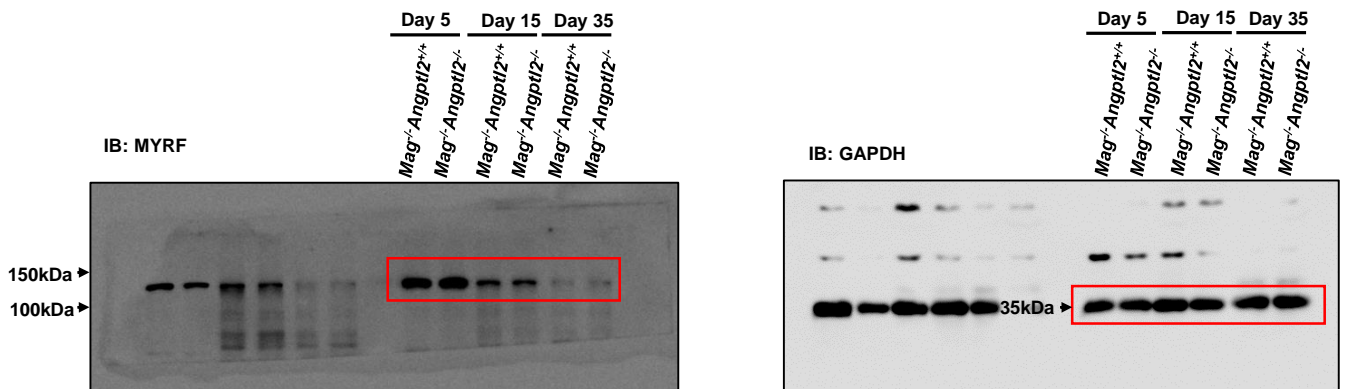

## Full unedited gel for Figure 6G

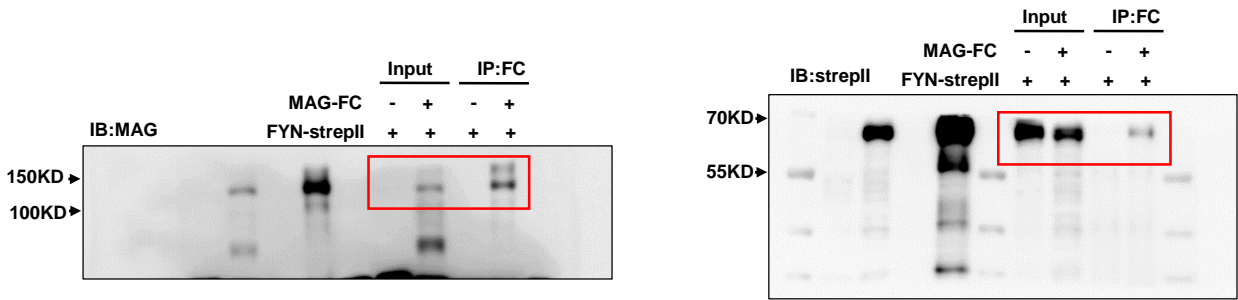

## Full unedited gel for Figure 6H

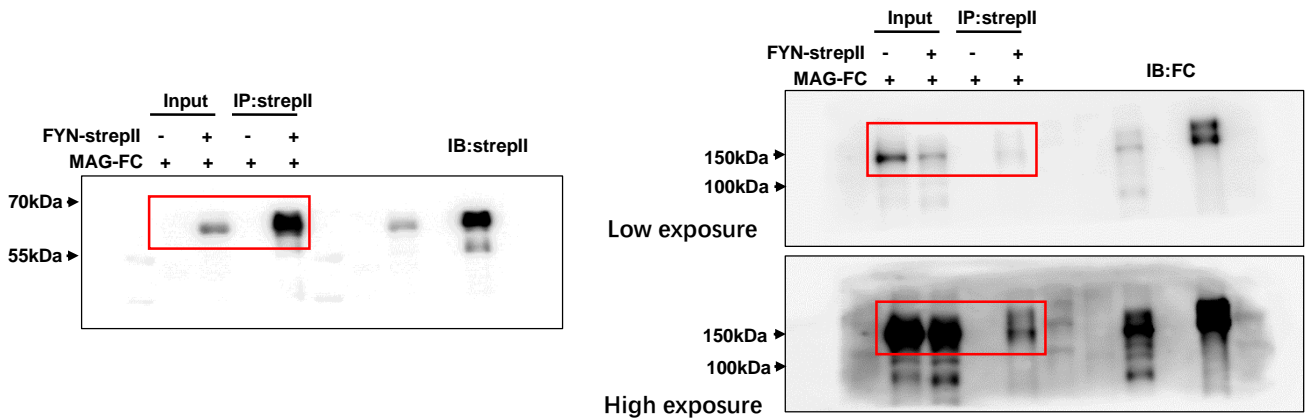

## Full unedited gel for Figure 6I

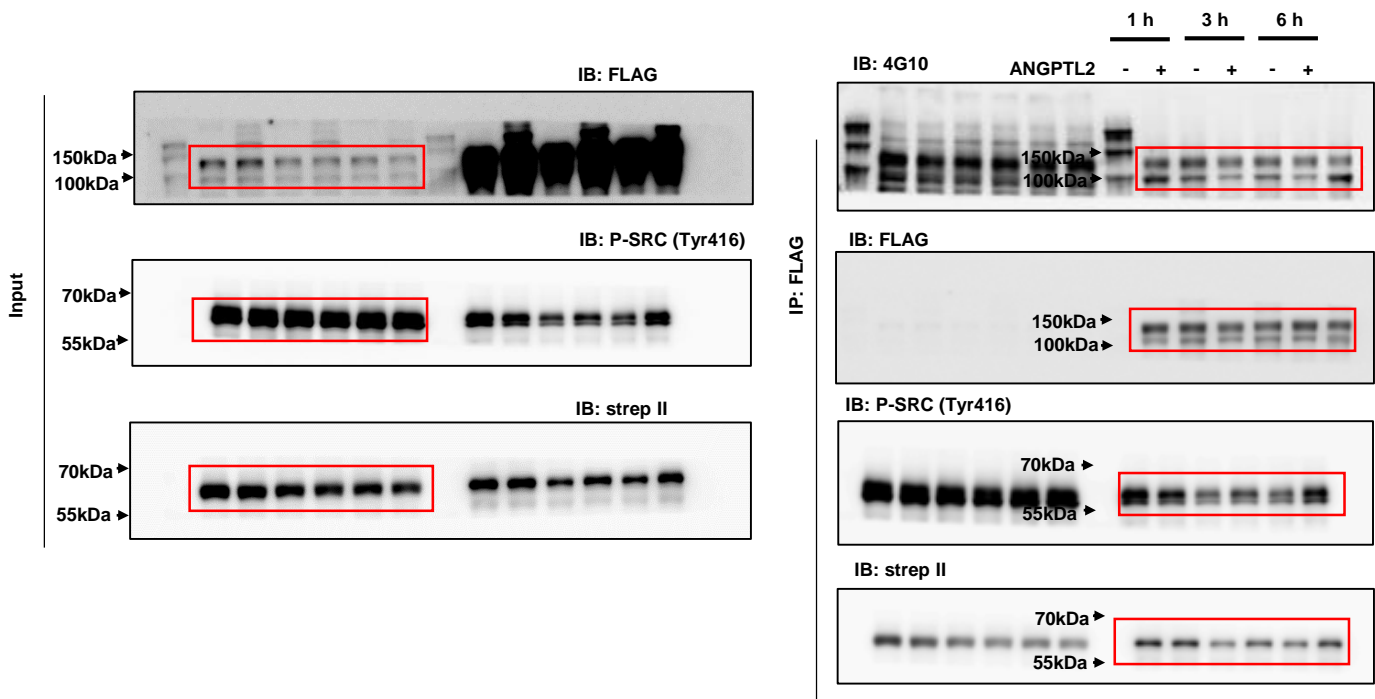

## Full unedited gel for Figure 6J

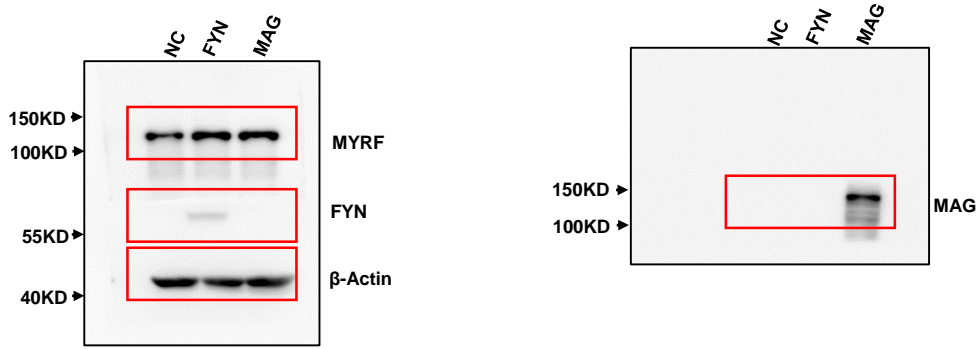

## Full unedited gel for Figure 6K

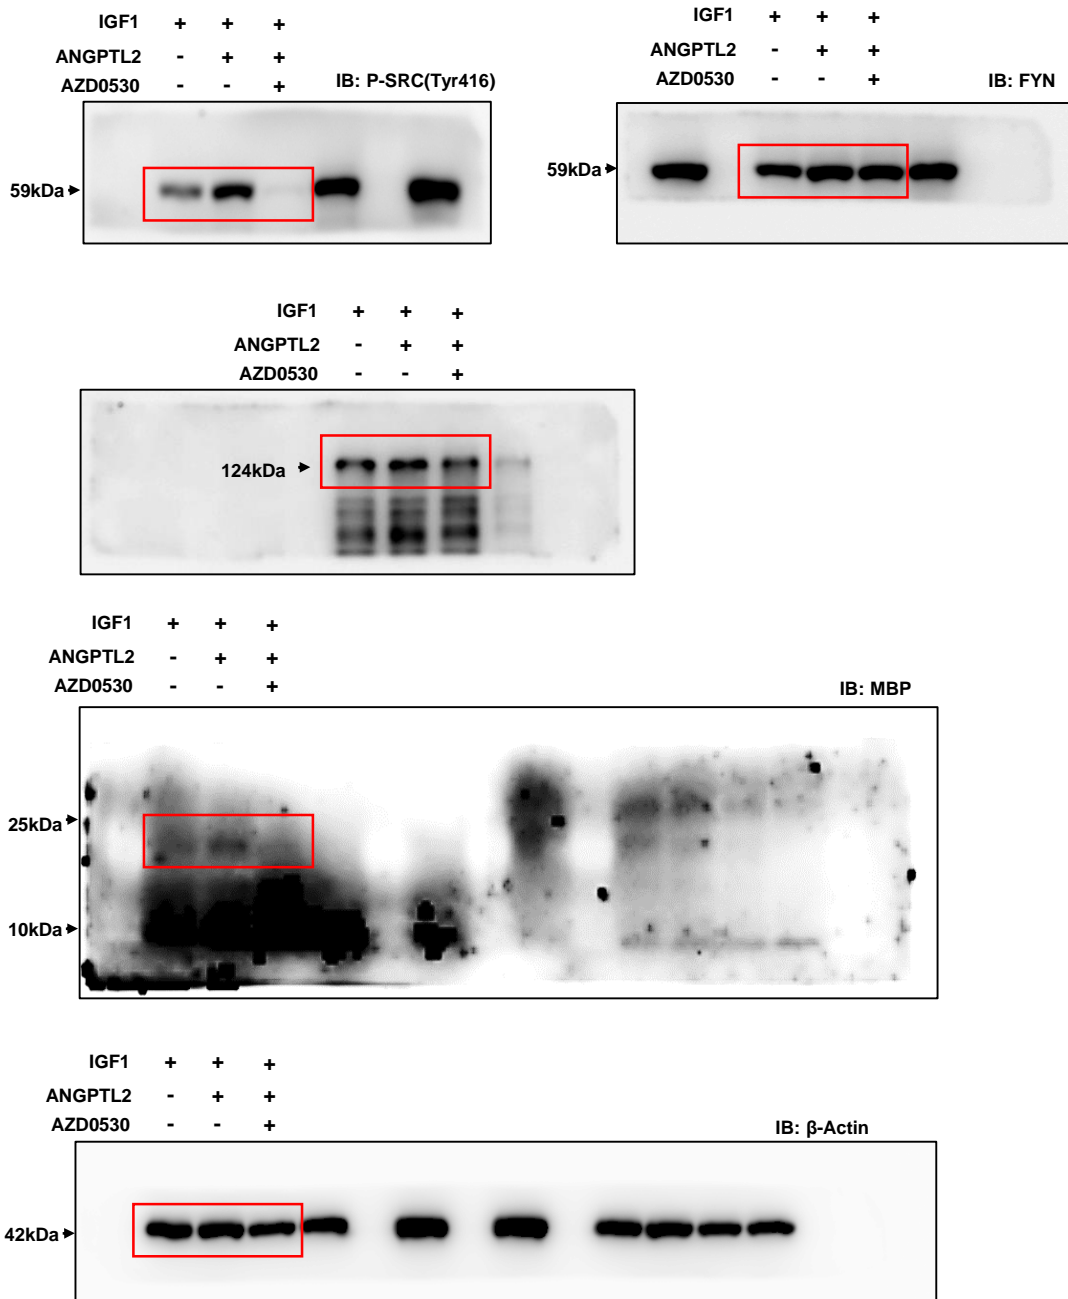



# Full unedited gel for Figure S6B

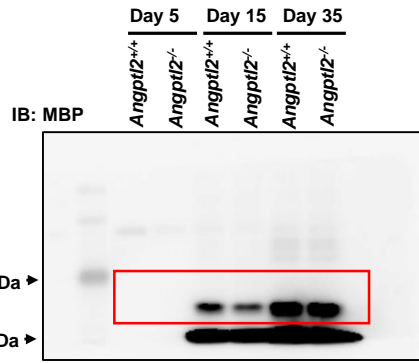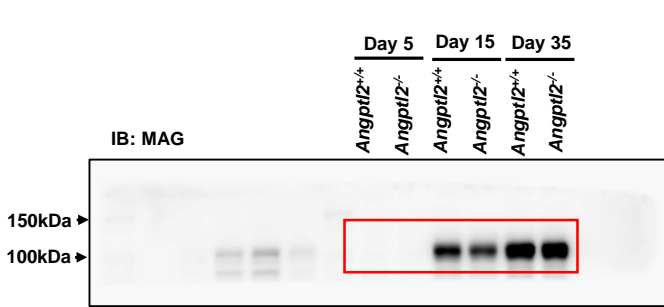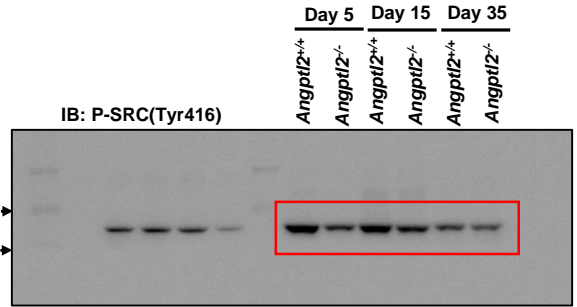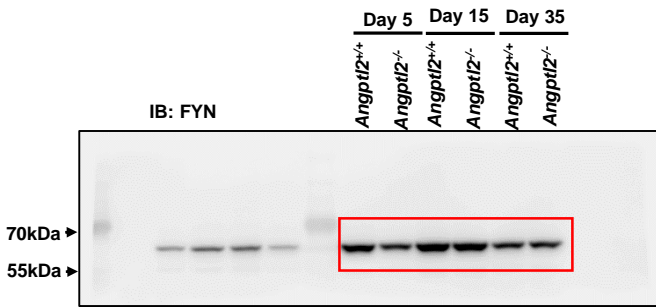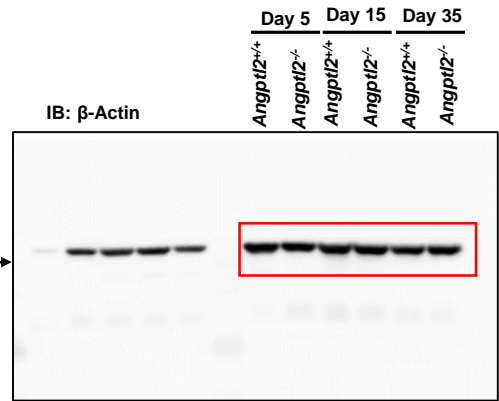

Supplement: 13578_2023_970_MOESM3_ESM.pdf [file 13578_2023_970_MOESM3_ESM.pdf]
